# Supplementary material for: Reduced Uterine Perfusion Pressure (RUPP) Model of Preeclampsia in Mice
Source: PubMed Central journal article supplement (PMC4871336; doi:10.1371/journal.pone.0155426), 2016-05-17
Supplement: pone.0155426.s003.pdf [file pone.0155426.s003.pdf]

|                   | Sham             | O,O'                     | U,U'                     | O,O'+U,U'                    |
|-------------------|------------------|--------------------------|--------------------------|------------------------------|
|                   | <i>n</i> = 13    | <i>n</i> = 14            | <i>n</i> = 14            | <i>n</i> = 11                |
| BW (g) @ 0.5 dpc  | 31.8 ± 0.8       | 30.9 ± 0.6               | 32.1 ± 0.8               | 30.6 ± 1.1                   |
| BW (g) @ 14.5 dpc | 47.2 ± 1.3       | 48.1 ± 1.2               | 49.5 ± 1.2               | 47.5 ± 1.9                   |
| BW (g) @ 18.5 dpc | 59.5 ± 1.6       | 53.6 ± 2.2               | 44.2 ± 2.6 <sup>a</sup>  | 35.9 ± 3.1 <sup>a,b,c</sup>  |
|                   | (59.5 ± 1.6, 13) | (56.9 ± 2.0, 12)         | (54.2 ± 1.1, 7)          | (44.3, 1)                    |
| kidney (g)        | 0.19 ± 0.01      | 0.20 ± 0.01              | 0.22 ± 0.01              | 0.22 ± 0.01                  |
| Liver (g)         | 2.42 ± 0.07      | 2.52 ± 0.09              | 2.39 ± 0.16              | 1.78 ± 0.13 <sup>a,b,c</sup> |
| Spleen (g)        | 0.15 ± 0.02      | 0.15 ± 0.02              | 0.20 ± 0.03              | 0.27 ± 0.05                  |
| Heart (g)         | 0.14 ± 0.02      | 0.17 ± 0.03 <sup>a</sup> | 0.19 ± 0.02 <sup>a</sup> | 0.18 ± 0.02 <sup>a</sup>     |
| Uterus (g)        | 23.6 ± 2.0       | 17.1 ± 1.9               | 8.8 ± 1.8 <sup>a,b</sup> | 3.7 ± 1.2 <sup>a,b</sup>     |
