# Supplementary material for: Reduced Uterine Perfusion Pressure (RUPP) Model of Preeclampsia in Mice
Source: PubMed Central journal article supplement (PMC4871336; doi:10.1371/journal.pone.0155426), 2016-05-17
Supplement: pone.0155426.s004.pdf [file pone.0155426.s004.pdf]

|                            | Sham          | O,O'                    | U,U'                      | O,O'+U,U'                  |
|----------------------------|---------------|-------------------------|---------------------------|----------------------------|
|                            | <i>n</i> = 13 | <i>n</i> = 14           | <i>n</i> = 14             | <i>n</i> = 11              |
| Litter size @14.5 dpc      | 13.8 ± 0.9    | 14.7 ± 0.8              | 15.7 ± 0.9                | 14.2 ± 1.3                 |
| Litter size @18.5 dpc      | 13.2 ± 1.0    | 8.7 ± 1.3 <sup>a</sup>  | 5.4 ± 1.3 <sup>a</sup>    | 1.2 ± 1.8 <sup>a,b,c</sup> |
| No. of resorptions         | 0.5 ± 1.0     | 4.6 ± 0.9 <sup>a</sup>  | 8.7 ± 1.3 <sup>a</sup>    | 4.6 ± 2.2 <sup>a</sup>     |
| Embryo survival (%)        | 98.1 ± 1.1    | 60.8 ± 8.6 <sup>a</sup> | 37.2 ± 9.6 <sup>a,b</sup> | 3.5 ± 3.5 <sup>a,b,c</sup> |
| Pregnancy with embryos (%) | 100           | 84.6                    | 46.7 <sup>a,b</sup>       | 9.1 <sup>a,b,c</sup>       |
| FGR (%) <sup>d</sup>       | 9.7 ± 3.3     | 37.0 ± 10.1             | 58.9 ± 9.7 <sup>a</sup>   | 100 <sup>a,b</sup>         |
